# Supplementary material
Source: PubMed Central journal article supplement (PMC5947936)
Supplement: EHP1849.s001.acco.pdf [file EHP1849.s001.acco.pdf]

**Note to readers with disabilities:** *EHP* strives to ensure that all journal content is accessible to all readers. However, some figures and Supplemental Material published in *EHP* articles may not conform to [508 standards](#) due to the complexity of the information being presented. If you need assistance accessing journal content, please contact [ehp508@niehs.nih.gov](mailto:ehp508@niehs.nih.gov). Our staff will work with you to assess and meet your accessibility needs within 3 working days.

## **Supplemental Material**

### **Ambient Ozone Pollution and Daily Mortality: A Nationwide Study in 272 Chinese Cities**

Peng Yin, Renjie Chen, Lijun Wang, Xia Meng, Cong Liu, Yue Niu, Zhijing Lin, Yunning Liu, Jiangmei Liu, Jinlei Qi, Jinling You, Maigeng Zhou, and Haidong Kan

#### **Table of Contents**

**Figure S1.** The location of cities in this study (n=272)

**Table S1.** Summary statistics (mean and standard deviation) of daily non-accidental deaths, co-pollutant concentrations and weather conditions in 272 Chinese cities, 2013-2015.

**Table S2.** Summary statistics (mean and standard deviation) of annual-average ozone concentrations ( $\mu\text{g}/\text{m}^3$ ) in 143 Chinese cities of 2 years or more data.

**Table S3.** National-average percentage differences (posterior means and 95% posterior intervals) in daily cardiovascular mortality per  $10 \mu\text{g}/\text{m}^3$  increase in ozone concentrations in 272 Chinese cities, classified by age, sex and educational attainment.

**Figure S2.** National-average percentage differences (posterior means and 95% posterior intervals) in daily total mortality per  $10 \mu\text{g}/\text{m}^3$  increase in cumulative lagged ozone concentrations over 0–3 days based on the polynomial distributed lag model in 272 Chinese cities, after adjustment of co-pollutants in two-pollutant models. Both ozone and co-pollutants were entered the model as cumulative lagged exposures over 0–3 days using the polynomial distributed lag model.

**Figure S3.** National-average percentage differences (posterior means and 95% posterior intervals) in daily total mortality per  $10 \mu\text{g}/\text{m}^3$  increase in cumulative lagged ozone concentrations over 0–3 days based on the polynomial distributed lag model in 272 Chinese cities, after adjustment of different lags of temperature. “lag 0” denotes temperature on the same day; “lag 0 and 1–3” denotes parallel lags of temperature on the same day and average lags over 1–3 days; “DLNM 0–3” denotes a cumulative lag of temperature built by the DLNM over the same day and 3 days prior; “DLNM 0–6” denotes a cumulative lag of temperature built by the DLNM over the same day and 6 days prior; “DLNM 0–13” denotes a cumulative lag of temperature built by the DLNM over the same day and 13 days prior.

**Figure S4.** National-average percentage changes (posterior means and 95% posterior intervals) in daily total mortality per  $10 \mu\text{g}/\text{m}^3$  increase in ozone concentrations in 272 Chinese cities, using different degrees of freedom in smoothness of time. Estimates were generated using over-dispersed generalized linear models and polynomial distributed lag model for cumulative exposures over the same day and 3 days prior, adjusted for calendar day (natural cubic spline with 4–8 *df*), day of the week, temperature (cross-basis function for temperature lagged for 0–13 days from distributed lag nonlinear model), and humidity (lag 0, natural smooth function, 3 *df*) to estimate city-specific associations that were combined using hierarchical Bayesian models.

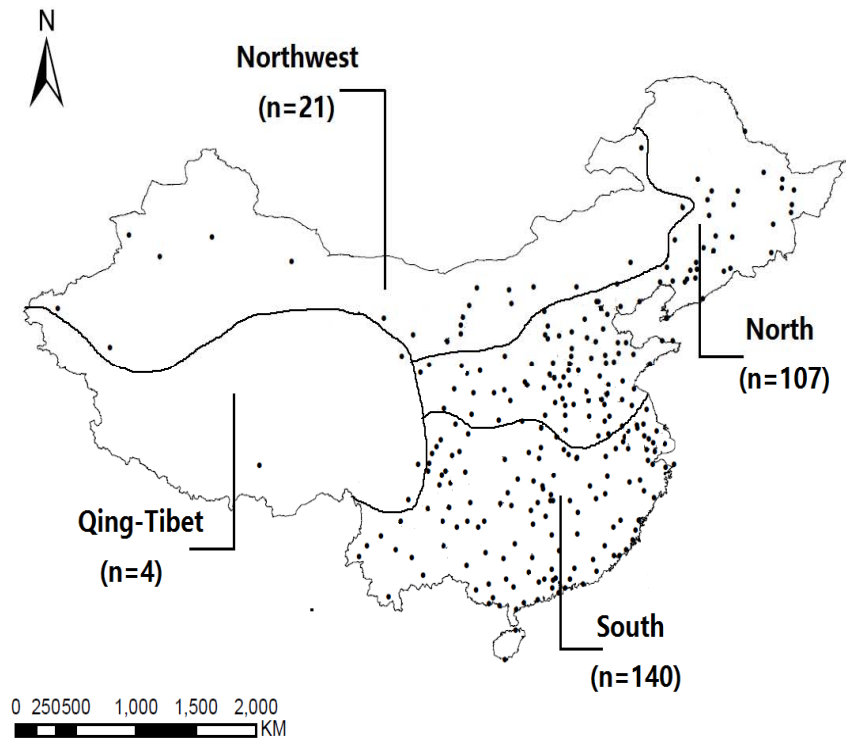

**Figure S1.** The location of cities in this study (n=272)

**Table S1.** Summary statistics (mean and standard deviation) of daily non-accidental deaths, co-pollutant concentrations and weather conditions in 272 Chinese cities, 2013-2015\*.

| Regions    | Deaths | PM <sub>2.5</sub> | SO <sub>2</sub> | NO <sub>2</sub> | CO      | Temp  | Humidity |
|------------|--------|-------------------|-----------------|-----------------|---------|-------|----------|
| Nationwide | 16±16  | 56±20             | 29±17           | 31±11           | 1.2±1.5 | 16±13 | 69±16    |
| Northwest  | 7±3    | 53±16             | 29±15           | 32±11           | 1.2±0.4 | 11±5  | 60±13    |
| North      | 16±14  | 57±21             | 32±19           | 32±12           | 1.3±1.7 | 16±18 | 68±19    |
| South      | 17±18  | 51±19             | 27±16           | 30±11           | 1.1±1.3 | 16±5  | 68±8     |
| Qing-Tibet | 5±3    | 78±33             | 43±26           | 44±13           | 1.3±0.4 | 16±2  | 68±8     |

\*Data are averaged on the annual level in all studied cities within each region.

Abbreviations: PM<sub>2.5</sub>, particulate matter with an aerodynamic diameter less than or equal to 2.5 µm, µg/m<sup>3</sup>; SO<sub>2</sub>, sulfur dioxide, µg/m<sup>3</sup>; NO<sub>2</sub>, nitrogen dioxide, µg/m<sup>3</sup>; CO, carbon monoxide, mg/m<sup>3</sup>.

**Table S2.** Summary statistics (mean and standard deviation) of annual-average ozone concentrations ( $\mu\text{g}/\text{m}^3$ ) in 143 Chinese cities of 2 years or more data.

| Regions    | N   | Cool period | Warm period |
|------------|-----|-------------|-------------|
| Nationwide | 143 | 71 $\pm$ 15 | 82 $\pm$ 13 |
| Northwest  | 8   | 65 $\pm$ 15 | 73 $\pm$ 18 |
| North      | 63  | 70 $\pm$ 13 | 84 $\pm$ 14 |
| South      | 72  | 73 $\pm$ 14 | 80 $\pm$ 12 |

Note: There were few cities with 2 years or more data in the Qing-Tibet region.

**Table S3.** National-average percentage differences (posterior means and 95% posterior intervals) in daily cardiovascular mortality per 10  $\mu\text{g}/\text{m}^3$  increase in ozone concentrations in 272 Chinese cities, classified by age, sex and educational attainment.

| Characteristics | Level          | Estimates          | p-values* |
|-----------------|----------------|--------------------|-----------|
| Age             | 5-64 yrs       | 0.21 (-0.12, 0.54) | 0.94      |
|                 | 65-74 yrs      | 0.28 (0.09, 0.47)  |           |
|                 | $\geq 75$ yrs  | 0.35 (0.03, 0.68)  |           |
| Sex             | Males          | 0.24 (0.03, 0.45)  | 0.88      |
|                 | Females        | 0.29 (0.07, 0.50)  |           |
| Education       | $\leq 9$ years | 0.29 (0.11, 0.47)  | 0.80      |
|                 | 9 years        | 0.19 (-0.26, 0.64) |           |

Note: Estimates were generated using over-dispersed generalized linear models and polynomial distributed lag model for cumulative exposures over the same day and 3 days prior, adjusted for calendar day (natural cubic spline with 7 *df*), day of the week, temperature (cross-basis function for temperature lagged for 0–13 days from distributed lag nonlinear model), and humidity (lag 0, natural smooth function, 3 *df*) to estimate city-specific associations that were combined using hierarchical Bayesian models.

\* The p-values were calculated by performing a likelihood ratio test between the simple meta-analysis model (overall estimates) and separate meta-regression model with a categorical variable (age, sex, or education).

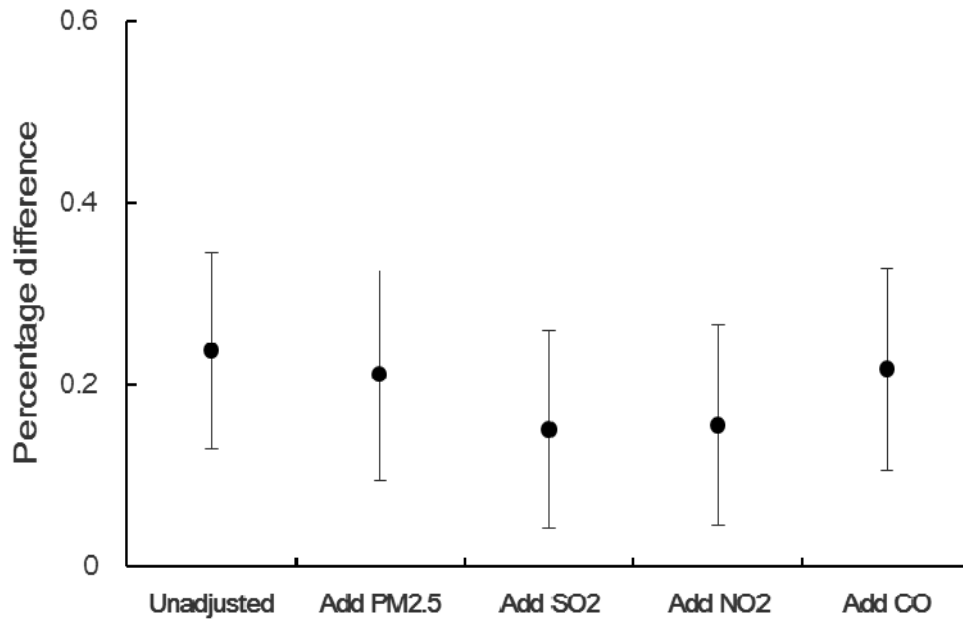

**Figure S2.** National-average percentage differences (posterior means and 95% posterior intervals) in daily total mortality per 10  $\mu\text{g}/\text{m}^3$  increase in cumulative lagged ozone concentrations over 0–3 days based on the polynomial distributed lag model in 272 Chinese cities, after adjustment of co-pollutants in two-pollutant models. Both ozone and co-pollutants were entered the model as cumulative lagged exposures over 0–3 days using the polynomial distributed lag model. Abbreviations:  $\text{PM}_{2.5}$ , particulate matter with an aerodynamic diameter less than or equal to 2.5  $\mu\text{m}$ ;  $\text{SO}_2$ , sulfur dioxide;  $\text{NO}_2$ , nitrogen dioxide; CO, carbon monoxide.

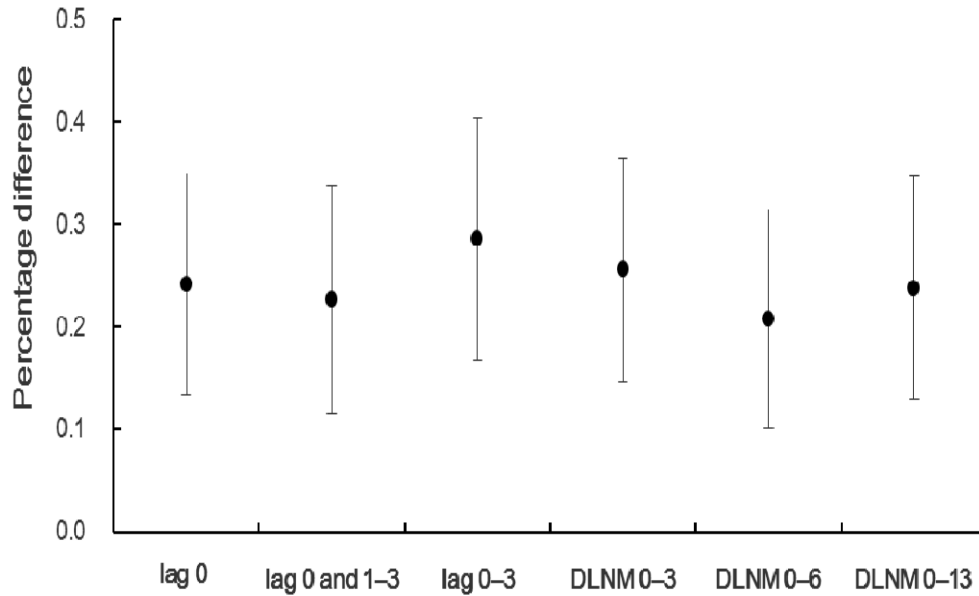

**Figure S3.** National-average percentage differences (posterior means and 95% posterior intervals) in daily total mortality per 10  $\mu\text{g}/\text{m}^3$  increase in cumulative lagged ozone concentrations over 0–3 days based on the polynomial distributed lag model in 272 Chinese cities, after adjustment of different lags of temperature. “lag 0” denotes temperature on the same day; “lag 0 and 1–3” denotes parallel lags of temperature on the same day and average lags over 1–3 days; “DLNM 0–3” denotes a cumulative lag of temperature built by the DLNM over the same day and 3 days prior; “DLNM 0–6” denotes a cumulative lag of temperature built by the DLNM over the same day and 6 days prior; “DLNM 0–13” denotes a cumulative lag of temperature built by the DLNM over the same day and 13 days prior. Abbreviations: DLNM, distributed lag nonlinear model.



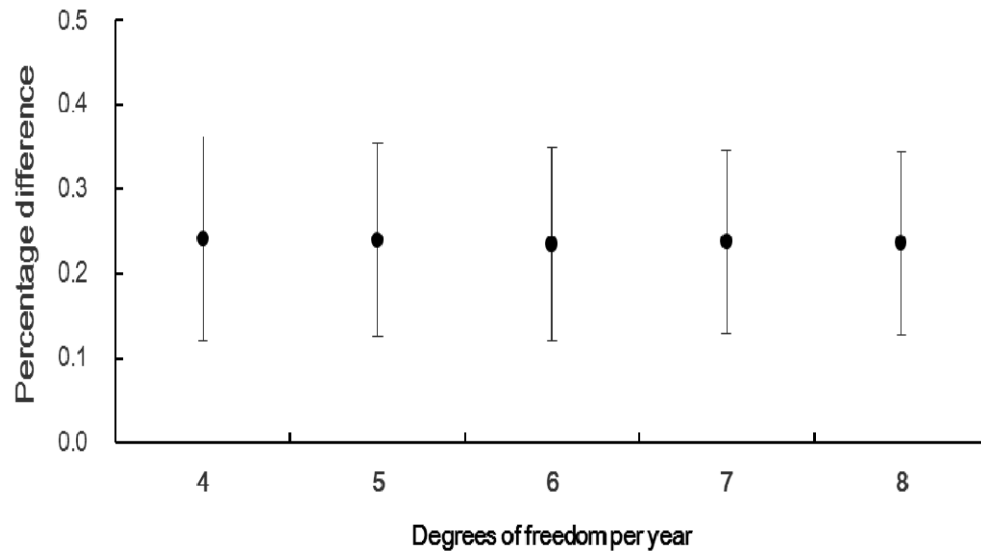

**Figure S4.** National-average percentage changes (posterior means and 95% posterior intervals) in daily total mortality per  $10 \mu\text{g}/\text{m}^3$  increase in ozone concentrations in 272 Chinese cities, using different degrees of freedom in smoothness of time. Estimates were generated using over-dispersed generalized linear models and polynomial distributed lag model for cumulative exposures over the same day and 3 days prior, adjusted for calendar day (natural cubic spline with 4–8 *df*), day of the week, temperature (cross-basis function for temperature lagged for 0–13 days from distributed lag nonlinear model), and humidity (lag 0, natural smooth function, 3 *df*) to estimate city-specific associations that were combined using hierarchical Bayesian models.
